# Supplementary material for: Support for the beam focusing hypothesis in the false killer whale
Source: Oxford University Press journal article supplement (doi:10.1242/jeb.119966), 2015-01-01
Supplement: jeb119966supp.pdf [file jeb119966supp.pdf]

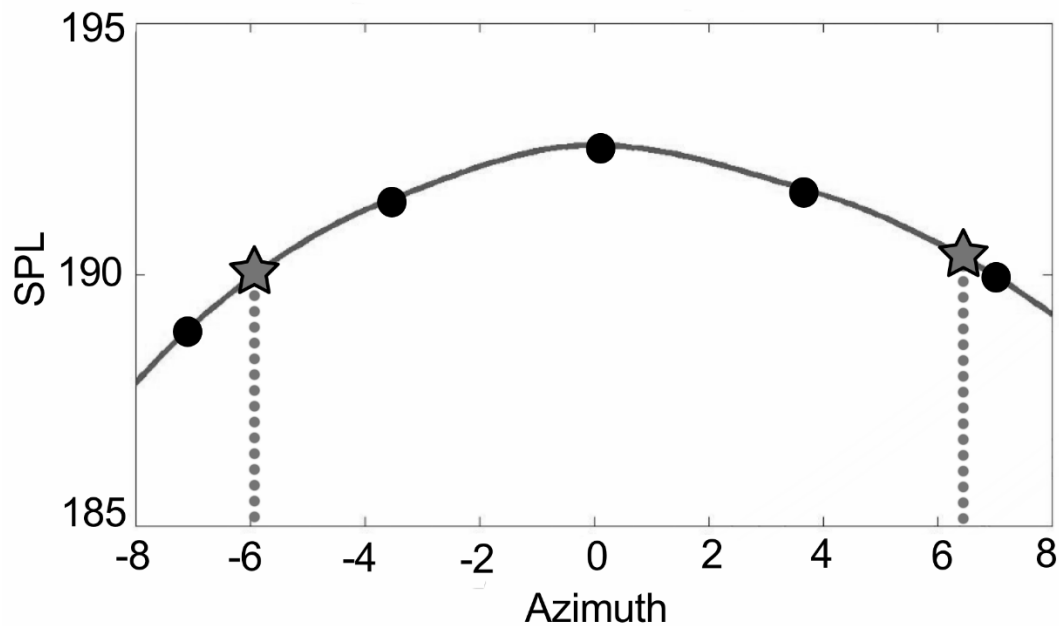

**Fig. S1: Example of cubic interpolation and -3dB beamwidth calculation from a single echolocation click recorded on one linear array.** Black circles indicate measured voltage values, converted to SPL (in dB re: 1 $\mu$ Pa). Gray solid line indicates the results of cubic interpolation across all azimuth values (in degrees). Gray stars represent the SPL values that are 3 dB lower, or -3dB relative to, the peak recorded amplitude. Gray dotted line indicates the corresponding azimuth value for each -3dB value. The resulting -3dB beamwidth is calculated as the difference between the azimuthal values for each -3dB cutoff.
